# Supplementary material for: A Multi-Medium Analysis of Human Health Risk of Toxic Elements in Rice-Crayfish System: A Case Study from Middle Reach of Yangtze River, China
Source: MDPI journal article supplement (doi:10.3390/foods11081160), 2022-04-16
Supplement: s1 [file s1]

# Supplementary Material

**A multi-medium analysis of human health risk of heavy metals in rice-crayfish system, a case study from middle reach of Yangtze River, China**

Hui Zhou <sup>al</sup>, Tao Ge <sup>bl</sup>, Hui Li <sup>a\*</sup>, Ting Fang <sup>c</sup>, Huaiyan Li <sup>a</sup>, Yanhong Shi <sup>a</sup>, Rong Zhang <sup>a</sup>, Xinju Dong <sup>d</sup>

<sup>a</sup> Anhui Province Key Laboratory of Farmland Ecological Conservation and Pollution Prevention, College of Resources and Environment, Anhui Agricultural University, Hefei 230026, Anhui, China

<sup>b</sup> Anhui institute of Geological Experiment, Hefei 230001, Anhui, China.

<sup>c</sup> Key Laboratory of Freshwater Aquaculture and Enhancement of Anhui Province, Fisheries Research Institute, Anhui Academy of Agricultural Sciences, Hefei 230031, Anhui, China

<sup>d</sup> Department of Chemistry, University of Louisville, Louisville, Kentucky 40292, USA.

\* Corresponding author.

E-mail address: zhpaper@126.com (Hui Li)

<sup>l</sup>These authors contribute equally to this work.

## **List of Figures and Tables**

**Table S1.** Instrumental operating conditions for the analysis of elements.

**Table S2.** The variables input for Monte Carlo simulations.

**Table S3.** The total variance explained and component matrices for the heavy metals in soils from RCS.

**Table S1.** Instrumental operating conditions for the analysis of elements.

| <b>Microwave digestion</b> | <b>Successive step</b> | <b>Heating program</b>           |
|----------------------------|------------------------|----------------------------------|
|                            | Step (1)               | 6 min, 120 °C, maintained 3 min  |
|                            | Step (2)               | 5 min, 160 °C, maintained 3 min  |
|                            | Step (3)               | 5 min, 190 °C, maintained 25 min |
| <b>ICP-OES</b>             | <b>Parameters</b>      | <b>Value</b>                     |
|                            | Plasma power           | 1300W                            |
|                            | Pump speed             | 30 rpm                           |
|                            | Coolant flow           | 14 L/min                         |
|                            | Auxiliary flow         | 1.0 L/min                        |
|                            | Nebulizer flow         | 0.7 L/min                        |
|                            | Optical temperature    | 14.0-16.0 °C                     |
|                            | Nebulizer pressure     | 2.0-4.0 Bar                      |
|                            | Main Argon Pressure    | 6.0-8.0 Bar                      |
|                            | Sample uptake rate     | 0.8 L/min                        |
|                            | Replicates             | 3                                |

**Table S2.** The variables input for Monte Carlo simulations.

| Variable               |          | Distribution                | Unit                            |        |
|------------------------|----------|-----------------------------|---------------------------------|--------|
| Body weight<br>(BW)    | Adults   | Lognormal (Mean=70, SD=5.8) | BWkg                            |        |
|                        | Children | Lognormal (Mean=25, SD=5.7) | BWkg                            |        |
| Ingestion rate<br>(IR) | Rice     | Adults                      | Lognormal (Mean=0.34, SD= 1.2 ) | kg/day |
|                        |          | Children                    | Lognormal (Mean=0.24, SD= 1.8)  | kg/day |
|                        | Crayfish | Adults                      | Lognormal (Mean=0.055, SD=1.4)  | kg/day |
|                        |          | Children                    | Lognormal (Mean=0.02, SD=2.1)   | kg/day |

**Table S3.** The total variance explained and component matrices for the heavy metals in soils from RCS.

| Component | Initial Eigenvalues |               |              | Extraction Sums of Squared Loadings |               |              |
|-----------|---------------------|---------------|--------------|-------------------------------------|---------------|--------------|
|           | Total               | % of Variance | Cumulative % | Total                               | % of Variance | Cumulative % |
| 1         | 5.711               | 71.387        | 71.387       | 5.711                               | 71.387        | 71.387       |
| 2         | 0.926               | 11.570        | 82.958       |                                     |               |              |
| 3         | 0.743               | 9.285         | 92.243       |                                     |               |              |
| 4         | 0.277               | 3.460         | 95.703       |                                     |               |              |
| 5         | 0.177               | 2.208         | 97.911       |                                     |               |              |
| 6         | 0.092               | 1.153         | 99.064       |                                     |               |              |
| 7         | 0.053               | 0.657         | 99.721       |                                     |               |              |
| 8         | 0.022               | 0.279         | 100.000      |                                     |               |              |

  

| Metals | Component Matrix <sup>a</sup> |  |
|--------|-------------------------------|--|
|        | PC1                           |  |
| Zn     | 0.976                         |  |
| Ni     | 0.973                         |  |
| Cr     | 0.943                         |  |
| Cu     | 0.941                         |  |
| Pb     | 0.905                         |  |
| As     | 0.857                         |  |
| Cd     | 0.512                         |  |
| Hg     | 0.470                         |  |

Note: Extraction method: principal component analysis. <sup>a</sup> one component extracted.
